# Supplementary material for: RinA controls phage-mediated packaging and transfer of virulence genes in Gram-positive bacteria
Source: PubMed Central journal article supplement — Nucleic Acids Res. 2011 Mar 30;39(14):5866–78. doi: 10.1093/nar/gkr158 (PMC3152322; doi:10.1093/nar/gkr158), 2011-03-30
Supplement: supp_gkr158_gkr158_Supplementary_data.pdf [file supp_gkr158_gkr158_Supplementary_data.pdf]

**Table S1. Strains used in this study**

| Strains | Description                                                                         | Reference  |
|---------|-------------------------------------------------------------------------------------|------------|
| RN4220  | Laboratory strain, restriction-defective derivative of RN450                        | (1)        |
| RN450   | NTCT8325 cured of $\phi$ 11, $\phi$ 12 and $\phi$ 13                                | (2)        |
| RN451   | RN450 lysogenic for $\phi$ 11                                                       | (2)        |
| RN10359 | RN450 lysogenic for $\phi$ 80 $\alpha$                                              | (3)        |
| JP1794  | RN451 (SaPI <sub>bov1</sub> <i>tst::tetM</i> )                                      | (4)        |
| JP4028  | RN451 $\Delta$ <i>rinA</i>                                                          | This study |
| JP4128  | JP4028 (SaPI <sub>bov1</sub> <i>tst::tetM</i> )                                     | This study |
| JP4221  | JP4028 (pJP740)                                                                     | This study |
| JP5961  | JP4128 (pJP740)                                                                     | This study |
| JP4027  | RN451 $\Delta$ <i>rinB</i>                                                          | This study |
| JP4127  | JP4027 (SaPI <sub>bov1</sub> <i>tst::tetM</i> )                                     | This study |
| JP3602  | RN10359 (SaPI1 <i>tst::tetM</i> )                                                   | (5)        |
| JP3603  | RN10359 (SaPI <sub>bov1</sub> <i>tst::tetM</i> )                                    | (5)        |
| JP4717  | RN10359 $\Delta$ <i>rinA</i>                                                        | This study |
| JP5293  | JP4717 (SaPI <sub>bov1</sub> <i>tst::tetM</i> )                                     | This study |
| JP5294  | JP4717 (SaPI1 <i>tst::tetM</i> )                                                    | This study |
| JP5418  | JP4717 (pJP740)                                                                     | This study |
| JP5419  | JP5293 (pJP740)                                                                     | This study |
| JP5420  | JP5294 (pJP740)                                                                     | This study |
| JP5011  | RN4220 lysogenic for $\phi$ SLT <i>pvl::tetM</i>                                    | This study |
| JP6895  | JP5011 $\Delta$ <i>rinA</i>                                                         | This study |
| JP6391  | JP6895 (pJP838)                                                                     | This study |
| JP4223  | RN451 (pJP742)                                                                      | This study |
| JP4222  | JP4028 (pJP742)                                                                     | This study |
| JP4216  | RN4220 (pJP743)                                                                     | This study |
| JP5963  | RN4220 (pJP744)                                                                     | This study |
| JP5619  | RN4220 (pJP746)                                                                     | This study |
| JP5620  | RN4220 (pJP747)                                                                     | This study |
| JP5925  | RN4220 (pJP748)                                                                     | This study |
| JP5926  | RN4220 (pJP749)                                                                     | This study |
| JP7188  | RN451 chimera $\phi$ 11- $\phi$ 69 ( $\phi$ 11 carrying <i>Pter</i> from $\phi$ 69) | This study |
| JP7242  | JP7188 (SaPI <sub>bov1</sub> <i>tst::tetM</i> )                                     | This study |
| JP7218  | JP7188 (pJP741)                                                                     | This study |
| JP7243  | JP7242 (pJP741)                                                                     | This study |
| JP3960  | <i>Enterococcus faecalis</i> V583                                                   | Lab strain |
| JP5093  | <i>Streptococcus pyogenes</i> NZ131                                                 | Lab strain |
| JP3345  | <i>Lactococcus lactis</i> IL1403                                                    | Lab strain |
| JP3762  | RN4220 (pJP535)                                                                     | This study |
| JP3763  | RN4220 (pJP537)                                                                     | This study |
| JP3766  | RN4220 (pJP543)                                                                     | This study |
| JP3767  | RN4220 (pJP544)                                                                     | This study |
| JP3779  | RN4220 (pJP564)                                                                     | This study |
| JP3780  | RN4220 (pJP565)                                                                     | This study |

**Table S2. Plasmids used in this study**

| Plasmids | Description                                                                                                                               | Reference  |
|----------|-------------------------------------------------------------------------------------------------------------------------------------------|------------|
| pMAD     | Vector for efficient allelic replacement                                                                                                  | (6)        |
| pJP508   | pMAD derivative. Deletion of <i>rinA</i> from $\phi$ 11 and 80 $\alpha$                                                                   | This study |
| pJP835   | pMAD derivative. Deletion of <i>rinA</i> from $\phi$ SLT                                                                                  | This study |
| pJP956   | pMAD derivative. Generation of the chimera $\phi$ 11- $\phi$ 69 ( $\phi$ 11 carrying <i>Pter</i> from $\phi$ 69)                          | This study |
| pCN51    | Expression vector                                                                                                                         | (7)        |
| pCN41    | Used in transcriptional fusions to the staphylococcal $\beta$ -lactamase <i>blaZ</i>                                                      | (7)        |
| pCN42    | Used in transcriptional fusions to the staphylococcal $\beta$ -lactamase <i>blaZ</i> . Contains the <i>Pcad</i> promoter                  | (7)        |
| pJP740   | Expression of $\phi$ 11 RinA, pCN51 derivative                                                                                            | This study |
| pJP741   | Expression of $\phi$ 69 RinA, pCN51 derivative                                                                                            | This study |
| pJP838   | Expression of $\phi$ SLT RinA, pCN51 derivative                                                                                           | This study |
| pJP742   | Transcriptional analysis of $\phi$ 11 <i>terS</i> , pCN41 derivative                                                                      | This study |
| pJP743   | Transcriptional analysis of $\phi$ 11 <i>terS</i> in presence of $\phi$ 11 RinA, pCN42 derivative                                         | This study |
| pJP744   | Transcriptional analysis of $\phi$ 11 <i>terS</i> in absence of RinA, pCN42 derivative                                                    | This study |
| pJP746   | Transcriptional analysis of $\phi$ 69 <i>terS</i> in presence of $\phi$ 69 RinA, pCN42 derivative                                         | This study |
| pJP747   | Transcriptional analysis of $\phi$ 69 <i>terS</i> in absence of RinA, pCN42 derivative                                                    | This study |
| pJP748   | Transcriptional analysis of $\phi$ 69 <i>terS</i> in presence of $\phi$ 11 RinA, pCN42 derivative                                         | This study |
| pJP749   | Transcriptional analysis of $\phi$ 11 <i>terS</i> in presence of $\phi$ 69 RinA, pCN42 derivative                                         | This study |
| pJP750   | Expression in <i>E. coli</i> of $\phi$ 11 RinA, pGEX-4T-1 derivative                                                                      | This study |
| pJP535   | Transcriptional analysis of <i>terS</i> from <i>E. faecalis</i> phage, in presence of the phage-encoded homologous RinA, pCN42 derivative | This study |
| pJP537   | <i>rinA</i> mutant of pJP535                                                                                                              | This study |
| pJP543   | Transcriptional analysis of <i>terS</i> from <i>S. pyogenes</i> phage, in presence of the phage-encoded homologous RinA, pCN42 derivative | This study |
| pJP544   | <i>rinA</i> mutant of pJP543                                                                                                              | This study |
| pJP564   | Transcriptional analysis of <i>terS</i> from <i>L. lactis</i> phage, in presence of the phage-encoded homologous RinA, pCN42 derivative   | This study |
| pJP565   | <i>rinA</i> mutant of pJP564                                                                                                              | This study |

**Table S3. Oligonucleotides used in this study**

| Plasmid | Oligonucleotides                                                       | Sequence (5'-3')                                                                                                                          |
|---------|------------------------------------------------------------------------|-------------------------------------------------------------------------------------------------------------------------------------------|
| pJP508  | orf28phi11-1mB<br>orf28phi11-2c<br>orf28phi11-3m<br>orf28phi11-4cE     | CGCGGATCCGTGATAAGAAGTGACGC<br>TTTAGTCATGAATACCCTCCG<br>CGGAGGGTATTCATGACTAAAAGATTGGCGGAAGAGTTAGGG<br>CCGGAATTCGTACTTCAGTGAAGTTATCG        |
| pJP835  | phiSLTp36-1mB<br>phiSLTp36-2c<br>phiSLTp36-3m<br>phiSLTp36-4cE         | CGCGGATCCATCAGAGCTGAAGTTTCATGG<br>GATATCATATATTGTGTTCCC<br>GGAACACAATATATGATATCAACTTTGTTAAAGCGGTAGCG<br>CCGGAATTCAAACATTTTAAGCCGATGGGC    |
| pJP956  | orf29phi11-11mB<br>orf28phi11-15c<br>orf30phi69-18m<br>orf25phi69-17cS | CGCGGATCCATCAGTCTGATTTGATGAGGGC<br>GTCTTCCCCTAACTCTCCG<br>CGGAAGAGTTAGGGGAAGACTAAGTTTGGAAAAAGTCTGG<br>ACGCGTCTGACTAATGTACTTCAGTGAAGTTATCG |
| pJP740  | orf28phi11-6mB<br>orf28phi11-5cK                                       | CGCGGATCCGGTGATGTAAAAGTTAAAGAGCG<br>CGGGGTACCACTGCCAATTTTCAGTCTTCCC                                                                       |
| pJP741  | orf30phi69-1mB<br>orf30phi69-6cK                                       | CGCGGATCCGTTTGGTGTGATGTTGCAAGC<br>CGGGGTACCATGTATTATACCTAATTCATCTGC                                                                       |
| pJP838  | phiSLTp36-5mB<br>phiSLTp36-6cE                                         | CGCGGATCCTTGCAGAATAAAGAAGTAACG<br>CCGGAATTCGCCTTTTGCACAATCTTTGC                                                                           |
| pJP742  | orf28phi11-5mB<br>orf29phi11-3cK                                       | CGCGGATCCATCAAGCAGGAAAGAACGC<br>CGGGGTACCTAACCTGCTGTAATTGCTGC                                                                             |
| pJP743  | orf28phi11-6mB<br>orf29phi11-3cK                                       | CGCGGATCCGGTGATGTAAAAGTTAAAGAGCG<br>CGGGGTACCTAACCTGCTGTAATTGCTGC                                                                         |
| pJP744  | orf28phi11-6mB<br>orf29phi11-3cK                                       | CGCGGATCCGGTGATGTAAAAGTTAAAGAGCG<br>CGGGGTACCTAACCTGCTGTAATTGCTGC                                                                         |
| pJP746  | orf30phi69-1mB<br>orf25phi69-2cK                                       | CGCGGATCCGTTTGGTGTGATGTTGCAAGC<br>CGGGGTACCTCATTACCACCAACTCTCGC                                                                           |
| pJP747  | orf30phi69-1mB<br>orf30phi69-3c<br>orf30phi69-4m<br>orf25phi69-2cK     | CGCGGATCCGTTTGGTGTGATGTTGCAAGC<br>CCTCATATCATAAGCAGTAGACATTGCTTTCACCCTATCTCC<br>GTCTACTGCTTATGATATGAGG<br>CGGGGTACCTCATTACCACCAACTCTCGC   |
| pJP748  | orf28phi11-6mB<br>orf28phi11-7cK<br>orf30phi69-5mK<br>orf25phi69-2cE   | CGCGGATCCGGTGATGTAAAAGTTAAAGAGCG<br>CGGGGTACCGTCTTCCCCTAACTCTTCCG<br>CGGGGTACCATTAAGTTTGGAAAAAGTCTGG<br>CCGGAATTCCAAATTAATTAATATGCCATCAG  |
| pJP749  | orf30phi69-1mB<br>orf30phi69-6cK<br>orf28phi11-8mK<br>orf29phi11-3cE   | CGCGGATCCGTTTGGTGTGATGTTGCAAGC<br>CGGGGTACCATGTATTATACCTAATTCATCTGC<br>CGGGGTACCCTGAAATTGGCAGTAAAGTGGC<br>CCGGAATTCCTAACCTGCTGTAATTGCTGC  |
| pJP750  | orf28phi11-5cX<br>orf28phi11-7mB/b                                     | CCGCTCGAGACTGCCAATTTTCAGTCTTCCC<br>CGCGGATCCATGACTAAAAGAAATACGG                                                                           |
| pJP535  | EF_V583-Pla-1mS<br>EF_V583-Pla-4cB                                     | ACGCGTCTGACAATCCATCAAGGCCGCATCG<br>CGCGGATCCTGTCTGGCAGTTCTCTAGC                                                                           |
| pJP537  | EF_V583-Pla-1mS<br>EF_V583-Pla-2c<br>EF_V583-Pla-3m<br>EF_V583-Pla-4cB | ACGCGTCTGACAATCCATCAAGGCCGCATCG<br>TAATTCTTCTTCCCCTTGGACG<br>TCAACGGGAAGAAGAATTACATTAATTGGACTTGCCCAGC<br>CGCGGATCCTGTCTGGCAGTTCTCTAGC     |
| pJP543  | Spy_NZ131-Pla-1mB<br>Spy_NZ131-Pla-4cE                                 | CGCGGATCCCGTGCTAGTGATGATAGAGC<br>CCGGAATTCCTTAATAGCCGCTGCTGTCTGC                                                                          |

| Plasmid | Oligonucleotides                                                               | Sequence (5'-3')                                                                                                                                        |
|---------|--------------------------------------------------------------------------------|---------------------------------------------------------------------------------------------------------------------------------------------------------|
| pJP544  | Spy_NZ131-Pla-1mB<br>Spy_NZ131-Pla-2c<br>Spy_NZ131-Pla-3m<br>Spy_NZ131-Pla-4cE | <u>CGCGGATCC</u> CGTGCTAGTGATGATAGAGC<br>AAATTTGCTCTTCTCCACCG<br>GTGGAGGAAGAGCAAATTTGCCTATACAAGACATCTGTCCG<br><u>CCGGAATTC</u> TTTAATAGCCGCTGCTGTCCG    |
| pJP564  | bIL309-Alt-1mB<br>bIL309-Alt-5cE                                               | <u>CGCGGATCC</u> CACACTTGGTCAGTAGTATGG<br><u>CCGGAATTC</u> TATAAATTTCTTGAACCTCACC                                                                       |
| pJP565  | bIL309-Alt-1mB<br>bIL309-Alt-2c<br>bIL309-Alt-3m<br>bIL309-Alt-5cE             | <u>CGCGGATCC</u> CACACTTGGTCAGTAGTATGG<br>AGAATATGCTGTACGAATGCC<br>CATTTCGTACAGCATATTCTGGTTACGGTGGTTTTACATGG<br><u>CCGGAATTC</u> TATAAATTTCTTGAACCTCACC |

\* Sequences recognized by the restriction enzymes used in cloning are underlined.

| Oligonucleotide                                          | Sequence (5'-3')                                                          | Description                                    |
|----------------------------------------------------------|---------------------------------------------------------------------------|------------------------------------------------|
| gyr-L<br>gyr-U                                           | CACCATGTAAACCACCAGATA<br>TTATGGTGCTGGGCAAATACA                            | qPCR. Expression of <i>gyrB</i> gene           |
| ORF29-phi11-4m<br>ORF30-phi11-2c                         | CAGCAGAGTCTTTAGCAAGTCG<br>CTTACCGCTCGAACCTCCACC                           | qPCR. Expression of $\phi$ 11 <i>terS</i> gene |
| ORF32-phi11-7m<br>ORF32-phi11-8c                         | GATGAGTTCGATGTAAAAGCG<br>TGAACACGTGCCGATTCCG                              | qPCR. Expression of $\phi$ 11 ORF32            |
| ORF34-phi11-4m<br>ORF34-phi11-5c                         | ATTAGGTAAGTACGAACCAATGG<br>GTCTAACGAATCACTGTTACGG                         | qPCR. Expression of $\phi$ 11 ORF34            |
| ORF37-phi11-1mB<br>ORF37-phi11-7c                        | <u>CGCGGATCC</u> AGTTGAACAAATACCGGAA<br>AGG<br>GTACCAAATTCTAAGAAACCAC     | qPCR. Expression of $\phi$ 11 ORF36            |
| ORF39-phi11-1m<br>ORF39-phi11-2c                         | TACAGAGGATAACAATGGACGG<br>GTGGAATCTGTATCCAGTCGC                           | qPCR. Expression of $\phi$ 11 ORF39            |
| ORF45-phi11-2m<br>ORF45-phi11-3c                         | AACGGTCGATTTAGCAACATGG<br>TCTCCATCAATGTATCTATACGC                         | qPCR. Expression of $\phi$ 11 ORF45            |
| ORF49-phi11-6m<br>ORF48-phi11-4cE                        | TTTTGTACCACAACCAGGCG<br><u>CCGGAATTC</u> GTTTTTCGAGTCGTCGATTA<br>CC       | qPCR. Expression of $\phi$ 11 ORF49            |
| ORF53-phi11-7m<br>ORF53-phi11-8c                         | AGTGGTTGAAAACCTTCTGAGGG<br>TACCTTTAGGGTTACTACCACG                         | qPCR. Expression of $\phi$ 11 ORF53            |
| ORF1-phi11-1m<br>ORF1-phi11-2c                           | AGCGTACGAGTGTCTTAAATGG<br>CTGTGTGGGCAGGTTTTAAAGC                          | qPCR. Expression of $\phi$ 11 <i>int</i>       |
| ORF29-phi11-sp1c<br>ORF29-phi11-sp2c<br>ORF29-phi11-sp3c | TGGTCAATAGATCTCTGACGC<br>AACCTCTTTTTCCACTTCATCG<br>TAGAAGCAGATAACGCTAAAGC | 5' RACE $\phi$ 11 <i>terS</i>                  |
| MH22<br>MH23                                             | CCTCTTTTTCCACTTCATCG<br>GTCGATATACGCACCATGAAC                             | 5' RACE 80 $\alpha$ <i>terS</i>                |
| UpTerSau-1m<br>DwTerSau-2c                               | AAAAATCATATCTAGATTGGCGG<br>TCATTATATATTCATCTGCGAATCTC                     | EMSA                                           |

**Figure S1. Comparison of the RinA protein sequences of  $\phi$ 11, 80 $\alpha$ ,  $\phi$ SLT and  $\phi$ 69.**

Colours indicate relative sequence conservation at each position, with red being most conserved and violet being least (adapted from alignment generated by PRALINE (8)). The scoring scheme works from 0 for the least conserved alignment position, up to 10 (\*) for the most conserved alignment position.

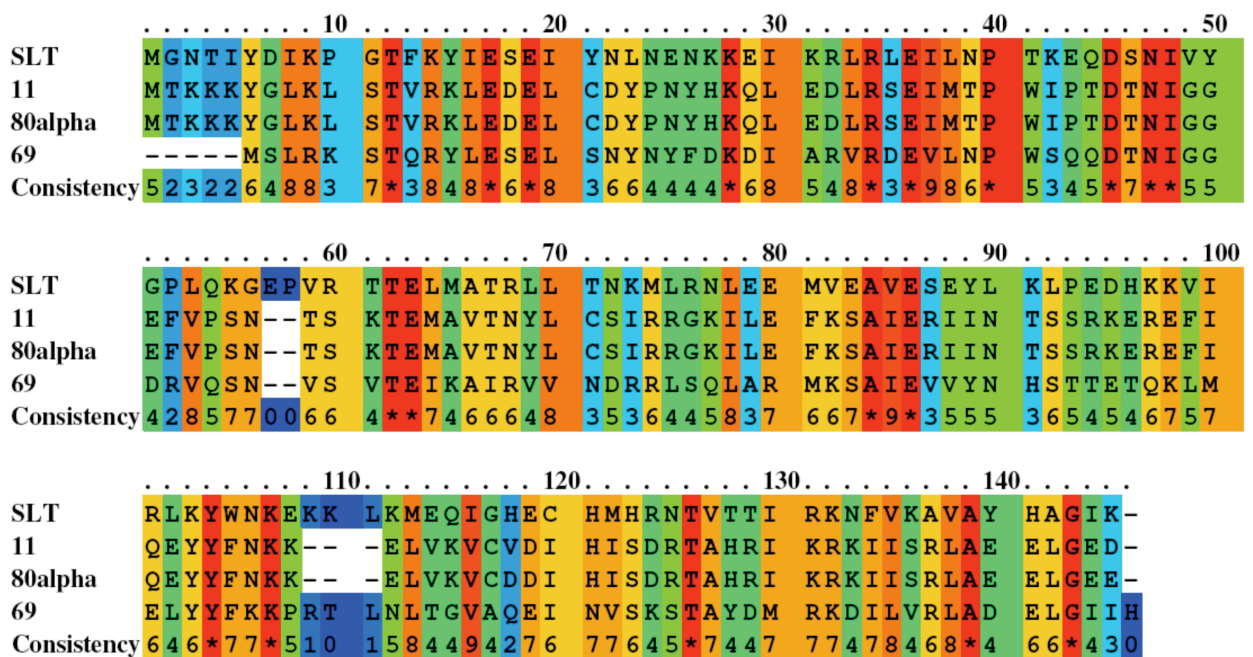



**Figure S3. RinA does not control expression of  $\phi$ 11 *int*.** Real time quantification of the expression of *int* in wild-type  $\phi$ 11 and a *rinA* mutant at different times (0, 30 or 60 min) after MC induction of the phage lytic cycle. Expression was normalized to *gyrB*, as described in Materials and Methods.

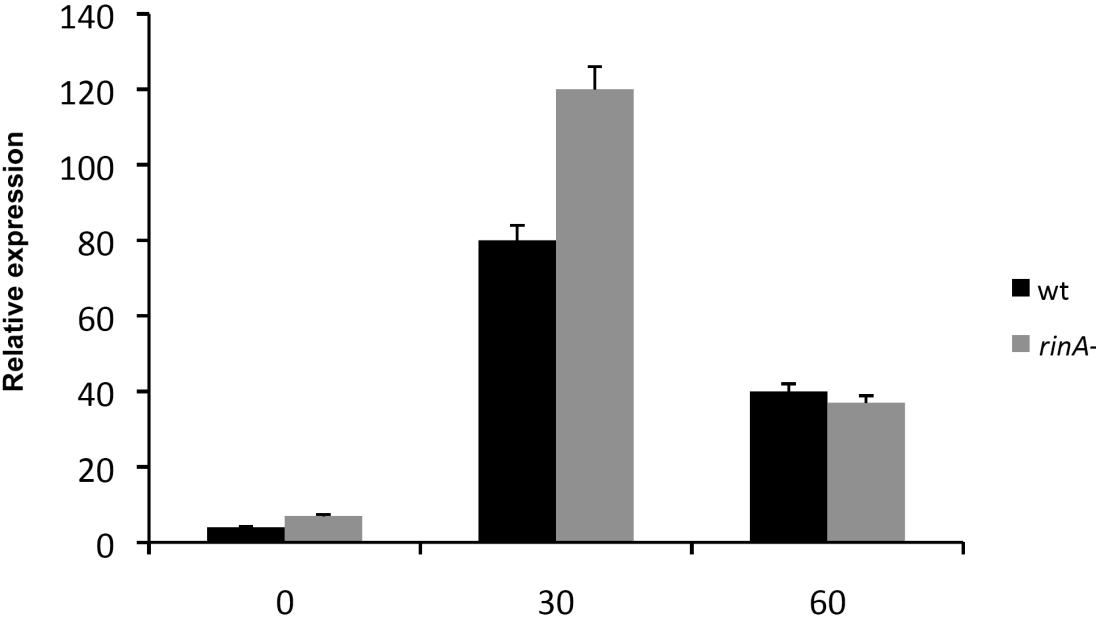

## References

1. Kreiswirth, B.N., Lofdahl, S., Betley, M.J., O'Reilly, M., Schlievert, P.M., Bergdoll, M.S. and Novick, R.P. (1983) The toxic shock syndrome exotoxin structural gene is not detectably transmitted by a prophage. *Nature*, **305**, 709-712.
2. Novick, R. (1967) Properties of a cryptic high-frequency transducing phage in *Staphylococcus aureus*. *Virology*, **33**, 155-166.
3. Ubeda, C., Barry, P., Penades, J.R. and Novick, R.P. (2007) A pathogenicity island replicon in *Staphylococcus aureus* replicates as an unstable plasmid. *Proc Natl Acad Sci U S A*, **104**, 14182-14188.
4. Ubeda, C., Maiques, E., Knecht, E., Lasa, I., Novick, R.P. and Penades, J.R. (2005) Antibiotic-induced SOS response promotes horizontal dissemination of pathogenicity island-encoded virulence factors in staphylococci. *Mol Microbiol*, **56**, 836-844.
5. Ubeda, C., Maiques, E., Barry, P., Matthews, A., Tormo, M.A., Lasa, I., Novick, R.P. and Penades, J.R. (2008) SaPI mutations affecting replication and transfer and enabling autonomous replication in the absence of helper phage. *Mol Microbiol*, **67**, 493-503.
6. Arnaud, M., Chastanet, A. and Debarbouille, M. (2004) New vector for efficient allelic replacement in naturally nontransformable, low-GC-content, gram-positive bacteria. *Appl Environ Microbiol*, **70**, 6887-6891.
7. Charpentier, E., Anton, A.I., Barry, P., Alfonso, B., Fang, Y. and Novick, R.P. (2004) Novel cassette-based shuttle vector system for gram-positive bacteria. *Appl Environ Microbiol*, **70**, 6076-6085.
8. Simossis, V.A., Kleinjung, J. and Heringa, J. (2005) Homology-extended sequence alignment. *Nucleic Acids Res*, **33**, 816-824.
